# Supplementary material for: Broad impacts of fine-scale dynamics on seascape structure from zooplankton to seabirds
Source: PubMed Central journal article supplement (PMC4218954; doi:10.1038/ncomms6239), 2014-10-15
Supplement: ncomms6239-s1.pdf [file ncomms6239-s1.pdf]

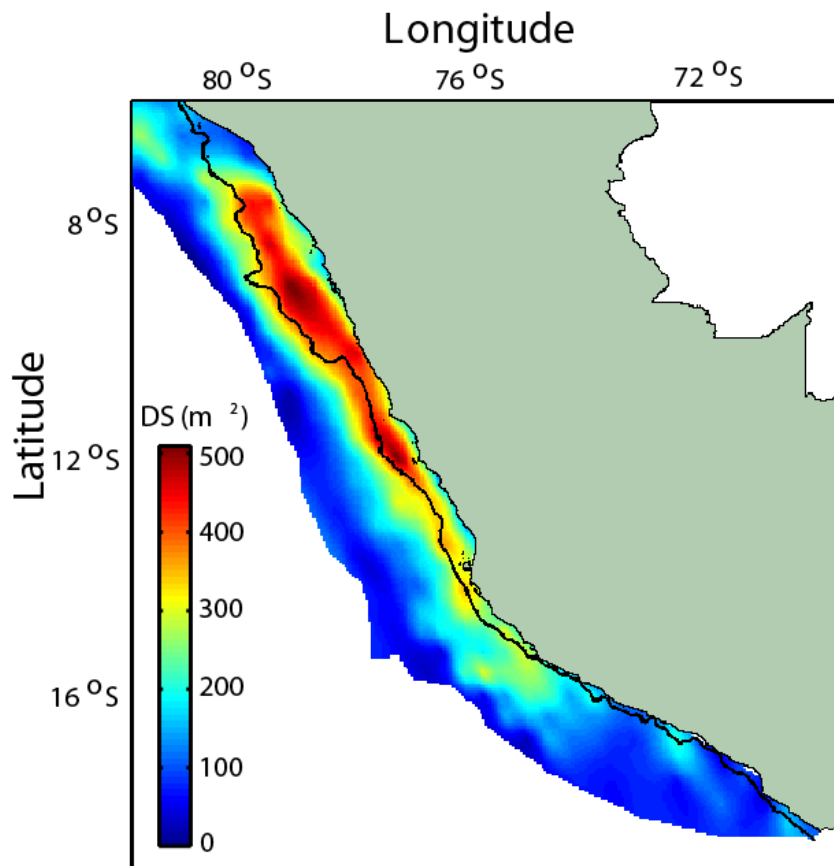

**Supplementary Figure 1 | Space-scale structures structure distribution.** Interpolated map of distribution of the downward deformation surface (DS) of the space-scale structures with a scale less than 1 km (the black line drawn represents the shelf break).

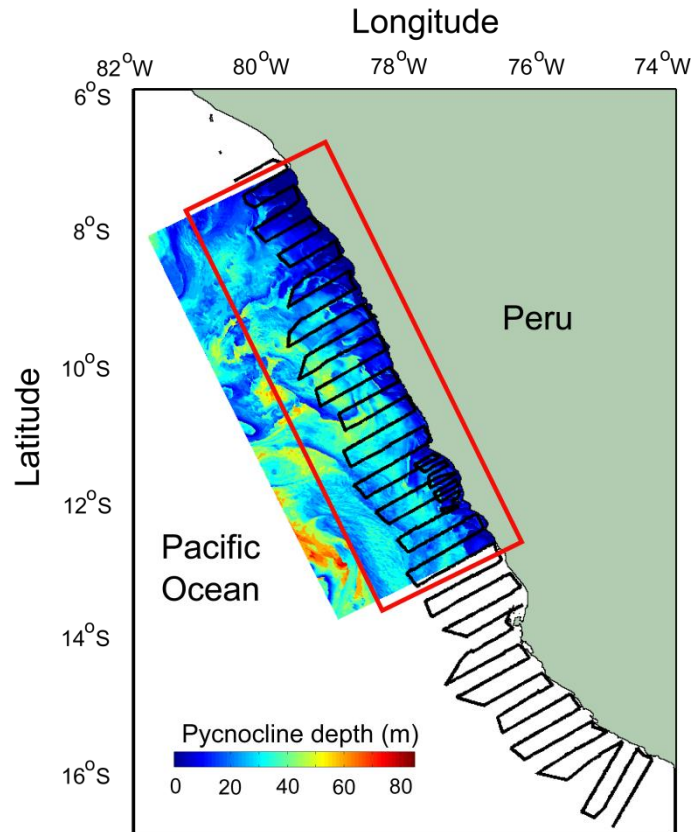

**Supplementary Figure 2 | ROMS configuration.** Pycnocline depth (colour shading) from the ROMS run performed for austral spring conditions and the path of the acoustic survey performed in November-December 2008 (black solid line). The red box shows the area used to compare acoustic and ROMS.

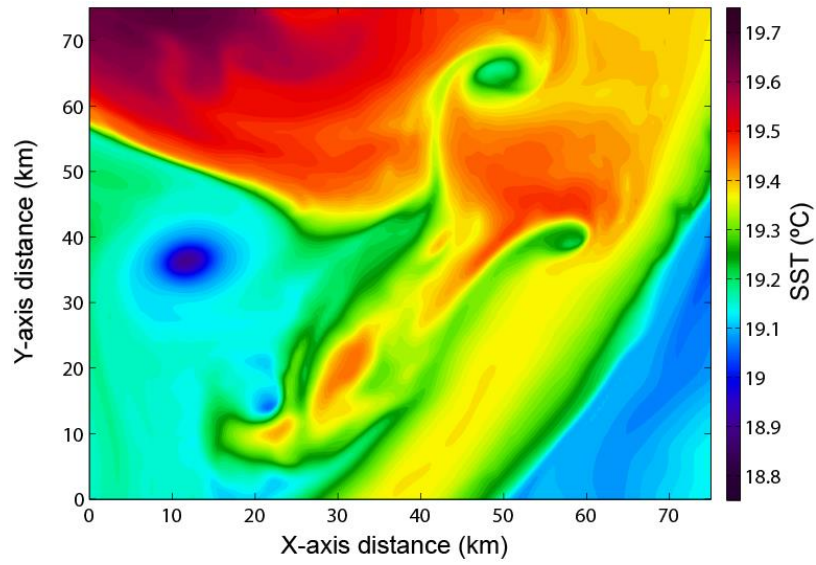

**Supplementary Figure 3 | ROMS output.** Snapshot of modelled sea surface temperature (SST in °C) exhibiting submesoscale coherent eddies and filaments off the coast of central Peru. The model grid horizontal resolution is 500 m.

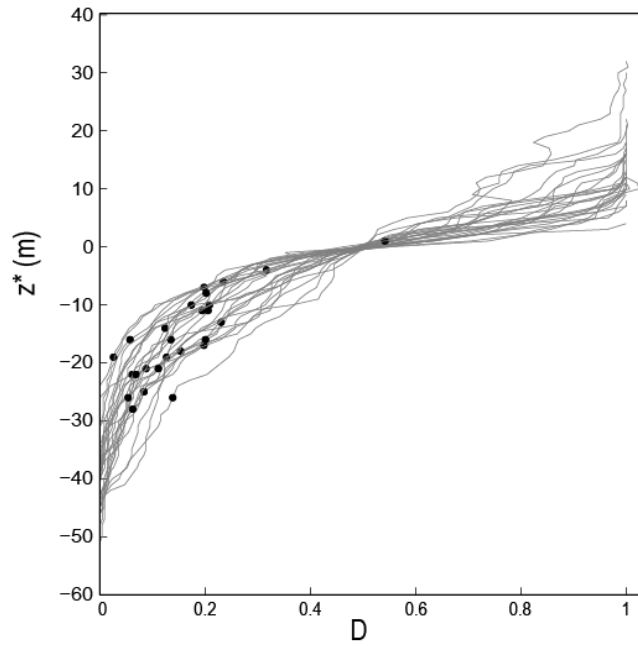

**Supplementary Figure 4 | Lower oxycline depth relationship with an isopycnal surface.** Water density profiles (grey solid line) for  $D = (\rho - \rho_{(60\text{ m})}) / (\rho_{(0\text{ m})} - \rho_{(60\text{ m})})$  as a function of  $z^* = z - z(D=0.5)$ ;  $D=0.5$  matching the region of largest vertical density gradient, i.e. the pycnocline location. In each profile, the black dots indicate the positions of the lower oxycline as inferred from acoustics.

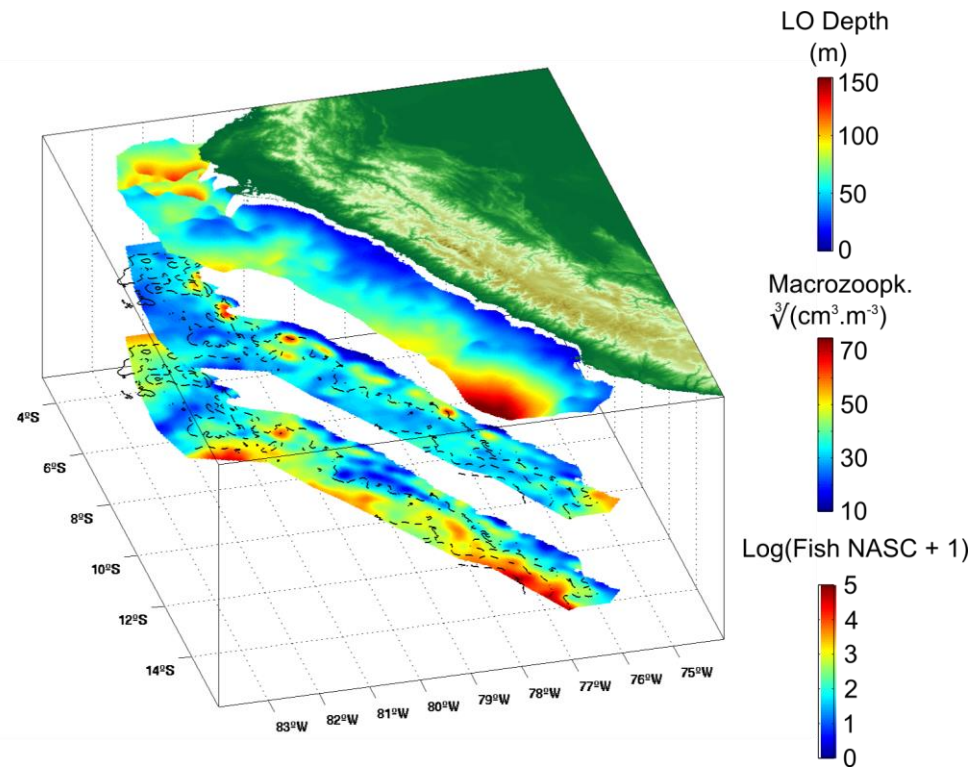

**Supplementary Figure 5 | Data description, night conditions in Austral Spring 2010.** The upper surface shows the acoustically estimated depth of the lower oxycline (LO, in m). The intermediate surface shows the acoustically estimated macrozooplankton biovolume (in  $\text{mm}^3 \text{m}^{-2}$ ) present above the oxycline. The lower surface shows the acoustically estimated pelagic fish biomass (nautical area scattering coefficient, NASC, in  $\text{m}^2 \text{nm}^{-2}$ ) present above the oxycline. Note that during the night the zooplankton and fish present in the oxygenated surface volume belong to the epipelagic plus the migrant mesopelagic communities.

**Supplementary Table 1 | Characteristic scales (in km) of turbulent structures.**

| Scale   | Acoustic (40 m)<br>All data | Acoustic (40 m)<br>ROMS Area | Acoustic (500 m)<br>ROMS Area | ROMS (500 m)<br>ROMS Area |
|---------|-----------------------------|------------------------------|-------------------------------|---------------------------|
| Scale 1 | 0.17-0.67                   | 0.17-0.51                    | n/a                           | n/a                       |
| Scale 2 | 1.4-3.7                     | 1.3-2.6                      | 1.6-3.7                       | 1.9-5.5                   |
| Scale 3 | 7.3-12.9                    | 4.1-9.7                      | 6.1-10.7                      | 9.7-15.6                  |
| Scale 4 | 22.8-33.4                   | 22.8-33.4                    | 22.8-36.8                     | 25.1-36.8                 |

Characteristic scales were identified from local maxima i.e. the zero-crossings of the second derivative of the density function of the lower oxycline deformation surface (DS) estimated from acoustic data (grain scale: 40 m) from the complete set of data, and from acoustic lower oxycline (grain scales: 40 and 500 m) and ROMS pycnocline depth (grain scale= 500 m) in the ocean area modelled by ROMS (Figure S2).

**Supplementary Table 2 | Characteristic scales (in km) of turbulent structure zooplankton and fish patch and seabird ARS.**

| Scale   | DS<br>Day+Night | DS<br>Day | Zooplankton<br>Day | Fish<br>Day | Booby<br>Day | Guanay<br>Day | DS<br>Night | Zooplankton<br>Night | Fish<br>Night |
|---------|-----------------|-----------|--------------------|-------------|--------------|---------------|-------------|----------------------|---------------|
| Scale 1 | 0.17-0.67       | 0.17-0.67 | 0.12-0.34          | 0.12-0.31   | 0.19-0.46    | 0.26-0.76     | 0.17-0.81   | 0.12-0.31            | 0.12-0.31     |
| Scale 2 | 1.4-3.7         | 1.4-4.5   | 1.3-3.1            | 1.3-2.8     | 1.4-3.5      | 1.3-3.2       | 1.4-3.4     | 1.3-2.8              | 1.3-3.0       |
| Scale 3 | 7.3-12.9        | 8.0-12.9  | 12.9-17.2          | 8.8-14.2    | 4.4-8.5      | 5.3-11.0      | 6.6-12.9    | 4.1-6.0              | 7.3-9.7       |
| Scale 4 | 22.8-33.4       | 22.8-36.8 | 30.4-33.4          | 27.6-40.5   | 18.5-25.9    | 17.6-23.5     | 20.7-33.4   | 15.6-33.4            | 22.8-36.8     |

Characteristic scales were identified from local maxima i.e. the zero-crossings of the second derivative of the density function of the lower oxycline deformation surface (DS), the zooplankton and fish biovolume/biomass estimated from acoustic data, and the seabird ARS diameter in the complete data set (grain scale=40 m).

**Supplementary Note 1 | Supplementary information for Figure 4** On November 25, 2011 the R/V was cruising in the area where seabird tagging was ongoing (Pescadores Island, 11°46'S - 77°15'W; ~7 km off the coast). To increase the acoustic spatial coverage in this area, the inter-transect distance was set to 5 nm instead of 15 nm. A tracked Guanay cormorant flew across the survey path 30 minutes after the R/V passed through and foraged within a submesoscale structure detected using acoustic data. This adult Guanay weighting 2025 g, performed a foraging trip from 11:09 am to 01:52 pm local time. The total distance travelled was 59.9 km at an average flight speed of 13.7 m s<sup>-1</sup>.
